# Supplementary material
Source: MDPI journal article supplement (https://www.mdpi.com/2076-3417/11/5/2190)
Supplement: s1 [file s1]

Supplementary Material

# Isolation, Purification and Characterization of Proteins in “Señorita” Banana (*Musa Acuminata* (AAA) ‘Señorita’) Pulp with Bioactive Peptides Exhibiting Antihypertensive and Antioxidant Activities

John Matthew Ferreras <sup>1,\*</sup>, Mary Ann Torio <sup>1</sup>, Mia Claire Marie Clemencia <sup>1</sup>, Amelia Hizon-Fradejas <sup>1</sup>, and Lawrence Yves Uy <sup>1</sup>

<sup>1</sup> Institute of Chemistry, College of Arts and Sciences, University of the Philippines - Los Baños

\* Correspondence: jcferreras@up.edu.ph

## Supplementary Material A

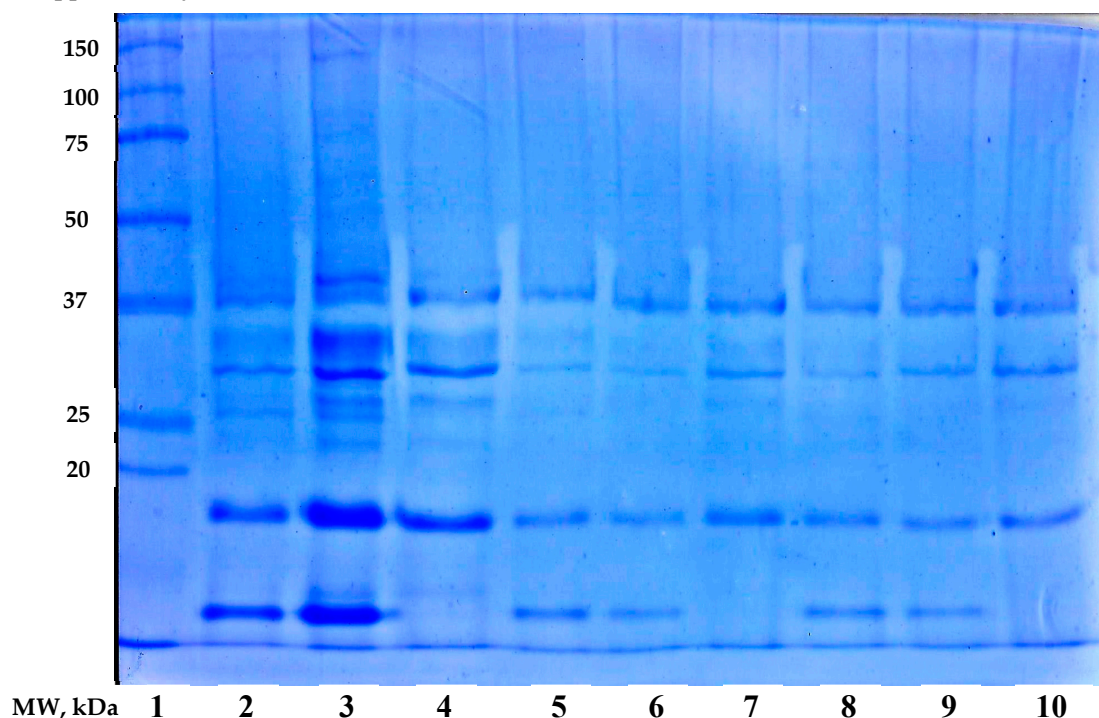

**Figure S1.** SDS-PAGE Profile for the comparison of the crude, partially purified and purified protein extract at different sample concentrations and sample to sample buffer ratio (figure legend given below).

| Lane No. | Sample                               | Sample to Sample Buffer Ratio |
|----------|--------------------------------------|-------------------------------|
| 1        | Protein Ladder                       | -                             |
| 2        | 167 µg/mL Crude Extract              | 2:1                           |
| 3        | 964 µg/mL Partially Purified Extract | 2:1                           |
| 4        | 152 µg/mL Purified Extract           | 2:1                           |
| 5        | 50 µg/mL Crude Extract               | 5:1                           |
| 6        | 50 µg/mL Partially Purified Extract  | 5:1                           |
| 7        | 50 µg/mL Purified Extract            | 5:1                           |
| 8        | 50 µg/mL Crude Extract               | 10:1                          |
| 9        | 50 µg/mL Partially Purified Extract  | 10:1                          |
| 10       | 50 µg/mL Purified Extract            | 10:1                          |

## Supplementary Material B

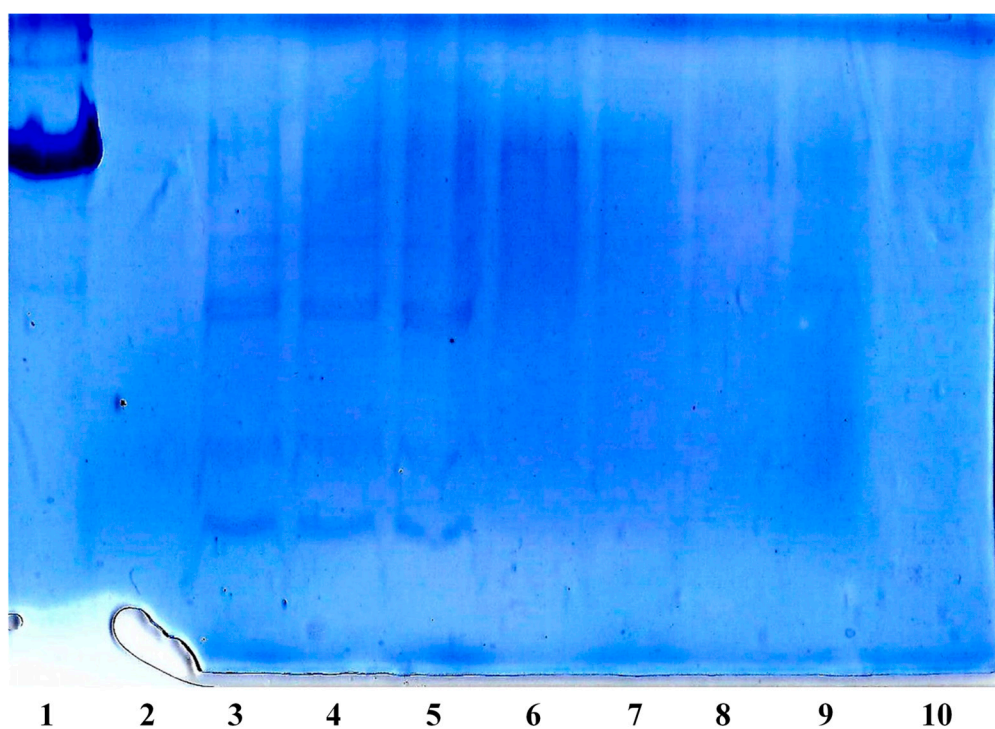

**Figure S2.** SDS-PAGE Profile of the obtained supernatants at different percent saturation during ammonium sulfate precipitation (figure legend given below).

| Lane No. | Sample                 | Sample to Sample Buffer Ratio |
|----------|------------------------|-------------------------------|
| 1        | Bovine Serum Albumin   | 1:1                           |
| 2        | Blank Lane             | -                             |
| 3        | 00% to 20% Supernatant | 1:1                           |
| 4        | 20% to 40% Supernatant | 1:1                           |
| 5        | 20% to 40% Supernatant | 2:1                           |
| 6        | 40% to 60% Supernatant | 1:1                           |
| 7        | 40% to 60% Supernatant | 2:1                           |
| 8        | 60% to 80% Supernatant | 1:1                           |
| 9        | 60% to 80% Supernatant | 2:1                           |
| 10       | 80% to 95% Supernatant | 1:1                           |

## Supplementary Material C

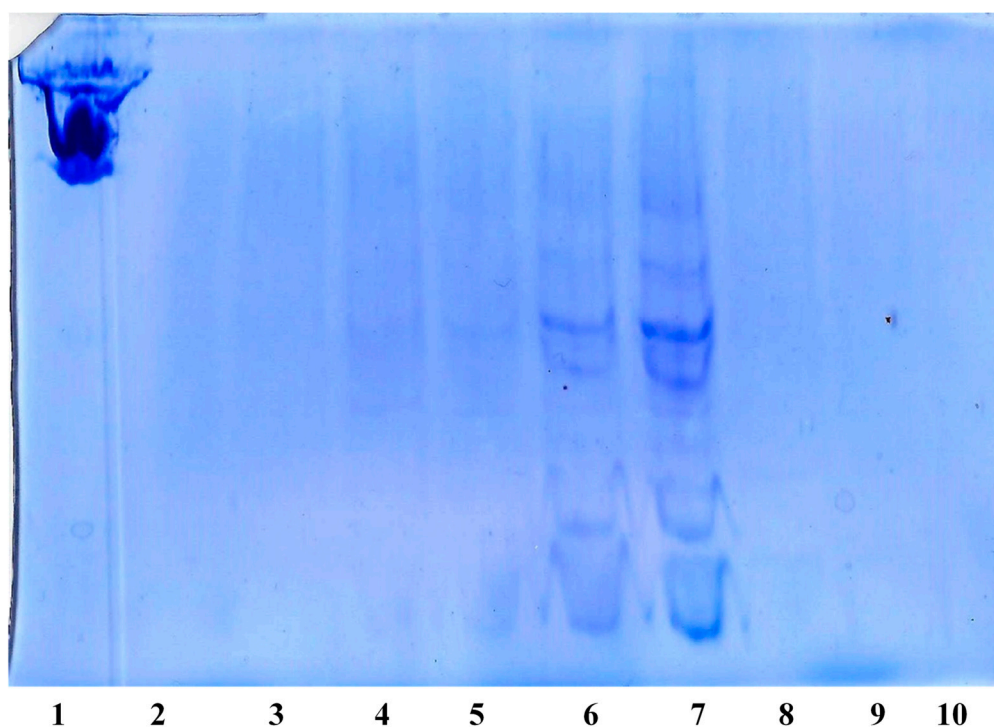

**Figure S3.** SDS-PAGE Profile of the obtained precipitates at different percent saturation during ammonium sulfate precipitation and their corresponding concentrations determined using colorimetric Bradford assay (figure legend given below).

| Lane No. | Sample                 | Protein<br>Concentration*, $\mu\text{g/mL}$ | Sample to Sample Buffer<br>Ratio |
|----------|------------------------|---------------------------------------------|----------------------------------|
| 1        | Bovine Serum Albumin   | -                                           | 1:1                              |
| 2        | Blank Lane             | -                                           | -                                |
| 3        | 00% to 20% Precipitate | $62.34 \pm 16.71$                           | 1:1                              |
| 4        | 20% to 40% Precipitate | $187.20 \pm 15.91$                          | 1:1                              |
| 5        | 20% to 40% Precipitate |                                             | 2:1                              |
| 6        | 40% to 60% Precipitate | $1383.23 \pm 57.34$                         | 1:1                              |
| 7        | 40% to 60% Precipitate |                                             | 2:1                              |
| 8        | 60% to 80% Precipitate | $92.91 \pm 11.11$                           | 1:1                              |
| 9        | 60% to 80% Precipitate |                                             | 2:1                              |
| 10       | 80% to 95% Precipitate | $108.20 \pm 17.84$                          | 1:1                              |

## Supplementary Material D

**Table S1.** Lectin active fragment search determined through BIOPEP protein analyzer.

| Sequence | Name                                                                  | Activity                          |
|----------|-----------------------------------------------------------------------|-----------------------------------|
| GP       | peptide regulating the stomach mucosal membrane activity              | regulating                        |
| GP       | peptide regulating the stomach mucosal membrane activity              | regulating                        |
| GP       | dipeptidyl peptidase IV inhibitor (DPP IV inhibitor)                  | dipeptidyl peptidase IV inhibitor |
| GP       | dipeptidyl peptidase IV inhibitor (DPP IV inhibitor)                  | dipeptidyl peptidase IV inhibitor |
| GP       | -                                                                     | antithrombotic                    |
| GP       | -                                                                     | antithrombotic                    |
| GP       | prolyl endopeptidase inhibitor                                        | antiamnestic                      |
| GP       | prolyl endopeptidase inhibitor                                        | antiamnestic                      |
| GP       | ACE inhibitor from Alaskan pollack skin                               | ACE inhibitor                     |
| GP       | ACE inhibitor from Alaskan pollack skin                               | ACE inhibitor                     |
| AW       | ACE inhibitor                                                         | ACE inhibitor                     |
| VK       | ACE inhibitor from buckwheat                                          | ACE inhibitor                     |
| VG       | ACE inhibitor                                                         | ACE inhibitor                     |
| IG       | ACE inhibitor                                                         | ACE inhibitor                     |
| GR       | ACE inhibitor                                                         | ACE inhibitor                     |
| AH       | ACE inhibitor                                                         | ACE inhibitor                     |
| EK       | ACE inhibitor                                                         | ACE inhibitor                     |
| AH       | peptide derived from egg white albumin                                | antioxidative                     |
| AW       | Antioxidant peptide from marine bivalve ( <i>Macra veneriformis</i> ) | antioxidative                     |
| EP       | dipeptidyl peptidase IV inhibitor (DPP IV inhibitor)                  | dipeptidyl peptidase IV inhibitor |
| EK       | dipeptidyl peptidase IV inhibitor (DPP IV inhibitor)                  | dipeptidyl peptidase IV inhibitor |
| AW       | dipeptidyl peptidase IV inhibitor (DPP IV inhibitor)                  | dipeptidyl peptidase IV inhibitor |
| AH       | dipeptidyl peptidase IV inhibitor (DPP IV inhibitor)                  | dipeptidyl peptidase IV inhibitor |
| TN       | dipeptidyl peptidase IV inhibitor (DPP IV inhibitor)                  | dipeptidyl peptidase IV inhibitor |
| TS       | dipeptidyl peptidase IV inhibitor (DPP IV inhibitor)                  | dipeptidyl peptidase IV inhibitor |
| VD       | dipeptidyl peptidase IV inhibitor (DPP IV inhibitor)                  | dipeptidyl peptidase IV inhibitor |
| VG       | dipeptidyl peptidase IV inhibitor (DPP IV inhibitor)                  | dipeptidyl peptidase IV inhibitor |

|    |                                                      |                                   |
|----|------------------------------------------------------|-----------------------------------|
| VK | dipeptidyl peptidase IV inhibitor (DPP IV inhibitor) | dipeptidyl peptidase IV inhibitor |
| VT | dipeptidyl peptidase IV inhibitor (DPP IV inhibitor) | dipeptidyl peptidase IV inhibitor |
| DM | ACE inhibitor                                        | ACE inhibitor                     |

Supplementary Material E

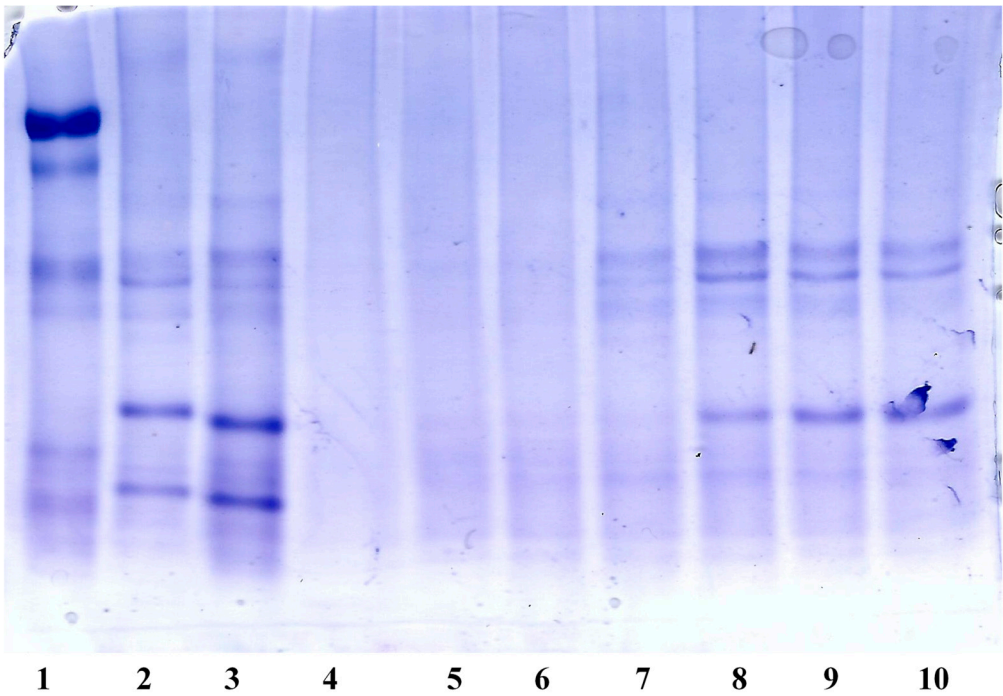

Figure S4. SDS-PAGE Profile of the obtained GFC Fractions [set 2] (figure legend given below).

| Lane No. | Sample                     | Sample to Sample Buffer Ratio |
|----------|----------------------------|-------------------------------|
| 1        | Bovine Serum Albumin       | 1:1                           |
| 2        | Crude Extract              | 1:1                           |
| 3        | Partially Purified Extract | 1:1                           |
| 4        | Fraction 7                 | 1:1                           |
| 5        | Fraction 9                 | 1:1                           |
| 6        | Fraction 11                | 1:1                           |
| 7        | Fraction 13                | 1:1                           |
| 8        | Fraction 15                | 1:1                           |
| 9        | Fraction 17                | 1:1                           |
| 10       | Fraction 19                | 1:1                           |



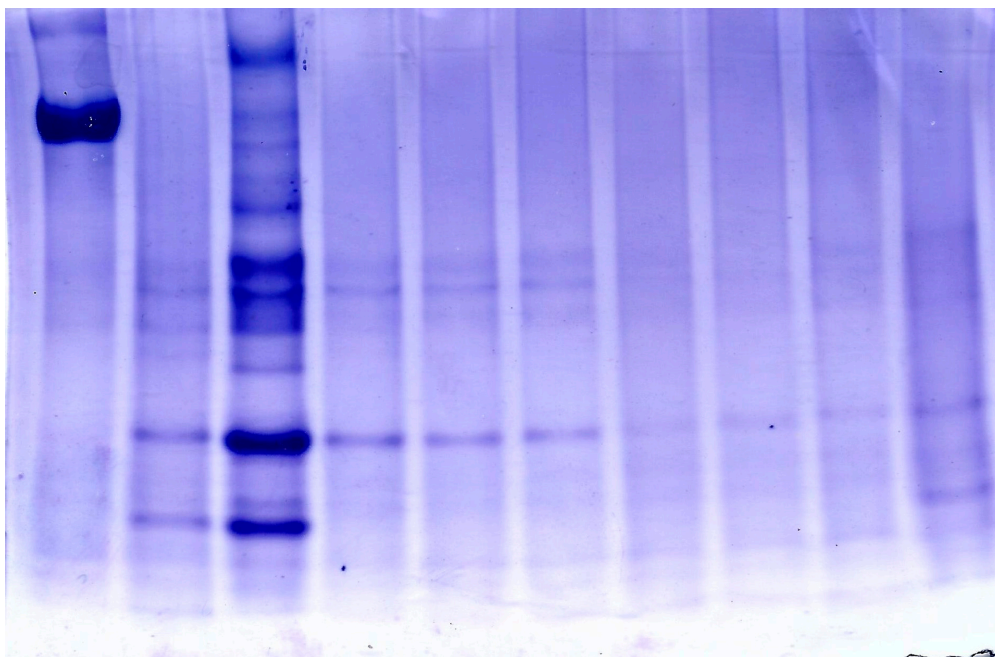

**Figure S5.** SDS-PAGE Profile of the obtained GFC Fractions [set 2] (figure legend given below).

| Lane No. | Sample                     | Sample to Sample Buffer Ratio |
|----------|----------------------------|-------------------------------|
| 1        | Bovine Serum Albumin       | 1:1                           |
| 2        | Crude Extract              | 1:1                           |
| 3        | Partially Purified Extract | 1:1                           |
| 4        | Fraction 21                | 1:1                           |
| 5        | Fraction 23                | 1:1                           |
| 6        | Fraction 25                | 1:1                           |
| 7        | Fraction 27                | 1:1                           |
| 8        | Fraction 29                | 1:1                           |
| 9        | Fraction 31                | 1:1                           |
| 10       | Partially Purified Extract | 1:1                           |

## Supplementary Material F

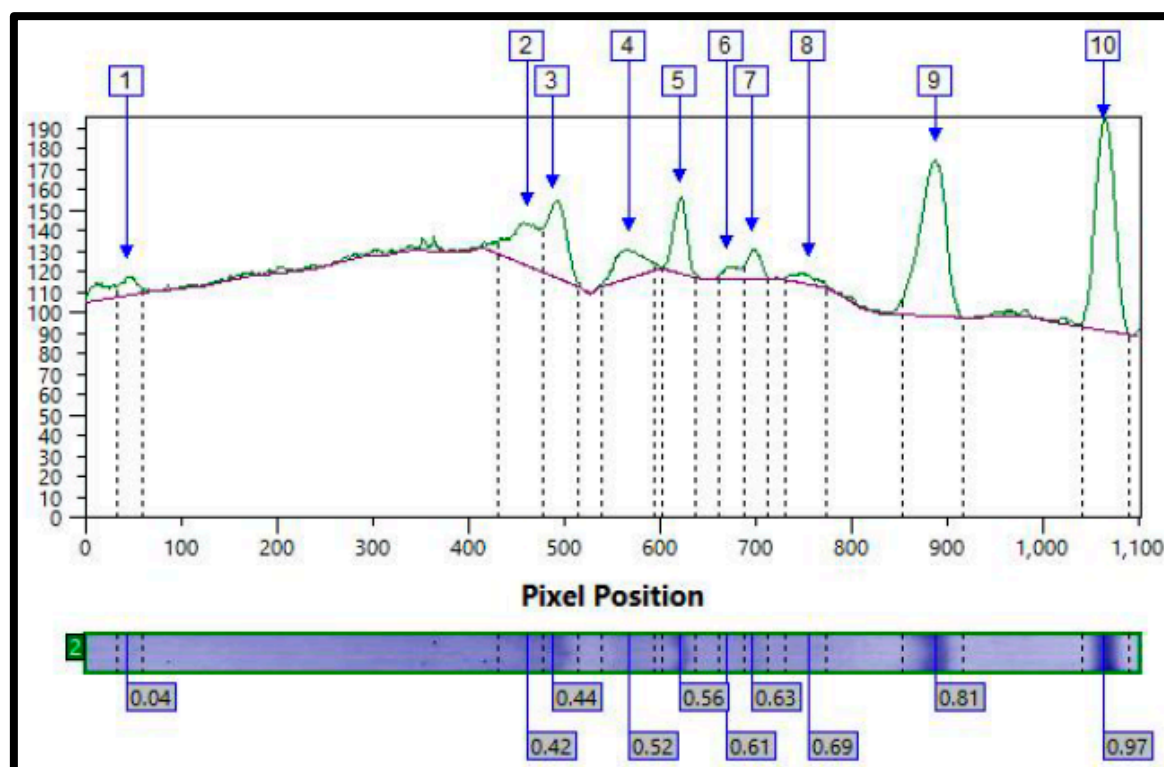

**Figure S6.** Densitometric analysis of the SDS-PAGE profile of the crude 'Señorita' banana protein extract.

**Table S2.** Estimated molecular weights and percent volume of each band present in SDS-PAGE profile of the crude 'Señorita' banana protein extract\*.

| Band No. | Volume           | Percent Volume (%) | Molecular Weight (kDa) |
|----------|------------------|--------------------|------------------------|
| 1        | 14409.65         | 2.20               | 117.64                 |
| 2        | 57853.62         | 8.82               | 43.05                  |
| 3        | 73184.89         | 11.15              | 40.52                  |
| 4        | 39475.75         | 6.02               | 33.44                  |
| 5        | 46281.30         | 7.05               | 29.55                  |
| 6        | 10136.45         | 1.54               | 26.25                  |
| 7        | 19549.66         | 2.98               | 24.64                  |
| 8        | 11299.22         | 1.72               | 21.32                  |
| 9        | <b>191466.37</b> | <b>29.18</b>       | <b>15.59</b>           |
| 10       | 192434.28        | 29.33              | 10.26                  |

\*with the major protein band(s) being focused on the study presented in bold characters.

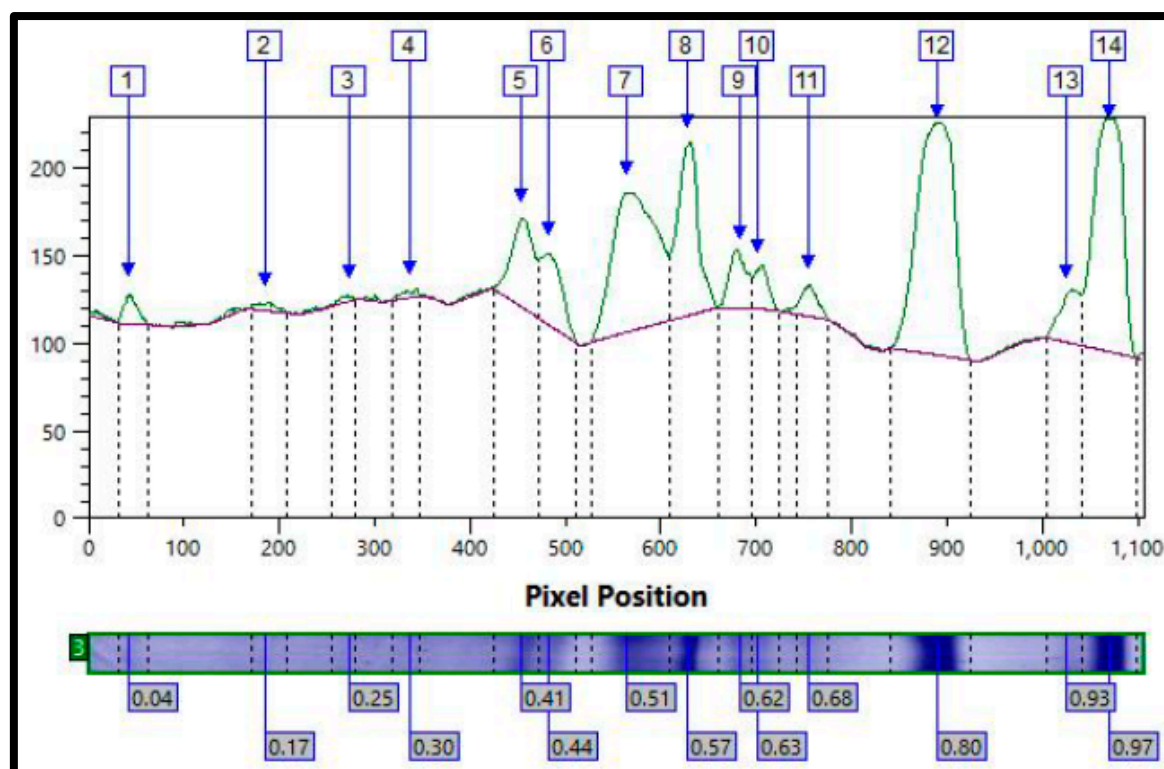

**Figure S7.** Densitometric analysis of the SDS-PAGE profile of the partially purified 'Señorita' banana protein extract.

**Table S3.** Estimated molecular weights and percent volume of each band present in SDS-PAGE profile of the partially purified 'Señorita' banana protein extract\*.

| Band No. | Volume    | Percent Volume (%) | Molecular Weight (kDa) |
|----------|-----------|--------------------|------------------------|
| 1        | 21262.00  | 1.17               | 117.64                 |
| 2        | 8792.73   | 0.48               | 84.00                  |
| 3        | 4509.00   | 0.25               | 67.87                  |
| 4        | 6588.13   | 0.36               | 58.42                  |
| 5        | 109463.82 | 6.01               | 44.32                  |
| 6        | 85790.18  | 4.71               | 41.28                  |
| 7        | 338942.45 | 18.61              | 33.97                  |
| 8        | 205085.55 | 11.26              | 29.24                  |
| 9        | 57332.00  | 3.15               | 25.57                  |
| 10       | 33694.00  | 1.85               | 24.58                  |
| 11       | 27535.98  | 1.51               | 21.66                  |
| 12       | 480725.00 | 26.39              | 15.67                  |
| 13       | 59436.38  | 3.26               | 11.34                  |
| 14       | 382382.62 | 20.99              | 10.18                  |

\*with the major protein band(s) being focused on the study presented in bold characters.



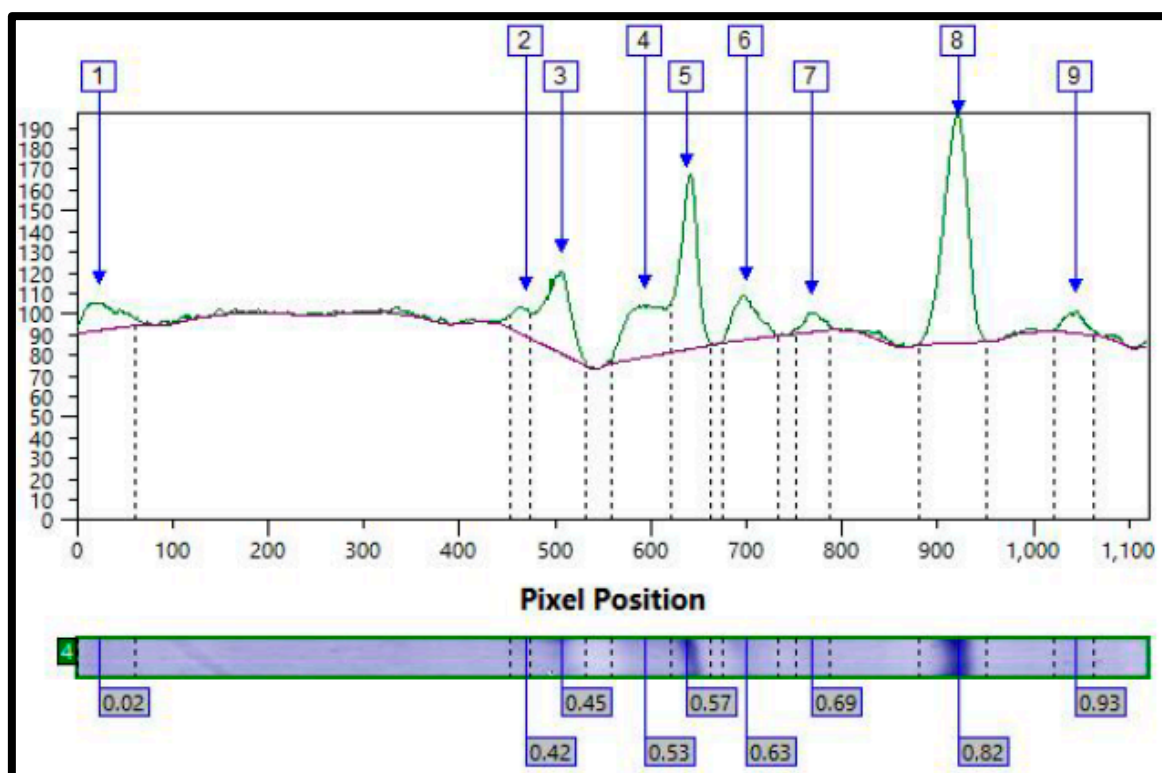

**Figure S8.** Densitometric analysis of the SDS-PAGE profile of the purified 'Señorita' banana protein extract.

**Table S4.** Estimated molecular weights and percent volume of each band present in SDS-PAGE profile of the purified 'Señorita' banana protein extract\*.

| Band No. | Volume    | Percent Volume (%) | Molecular Weight (kDa) |
|----------|-----------|--------------------|------------------------|
| 1        | 54130.30  | 5.98               | 123.35                 |
| 2        | 21391.96  | 2.36               | 43.28                  |
| 3        | 123676.98 | 13.65              | 39.47                  |
| 4        | 119624.00 | 13.20              | 32.15                  |
| 5        | 172102.00 | 19.00              | 29.09                  |
| 6        | 61229.72  | 6.76               | 25.10                  |
| 7        | 20209.87  | 2.23               | 21.43                  |
| 8        | 309701.08 | 34.19              | 14.95                  |
| 9        | 23872.35  | 2.64               | 11.19                  |

\*with the major protein band(s) being focused on the study presented in bold characters.

## Supplementary Material G

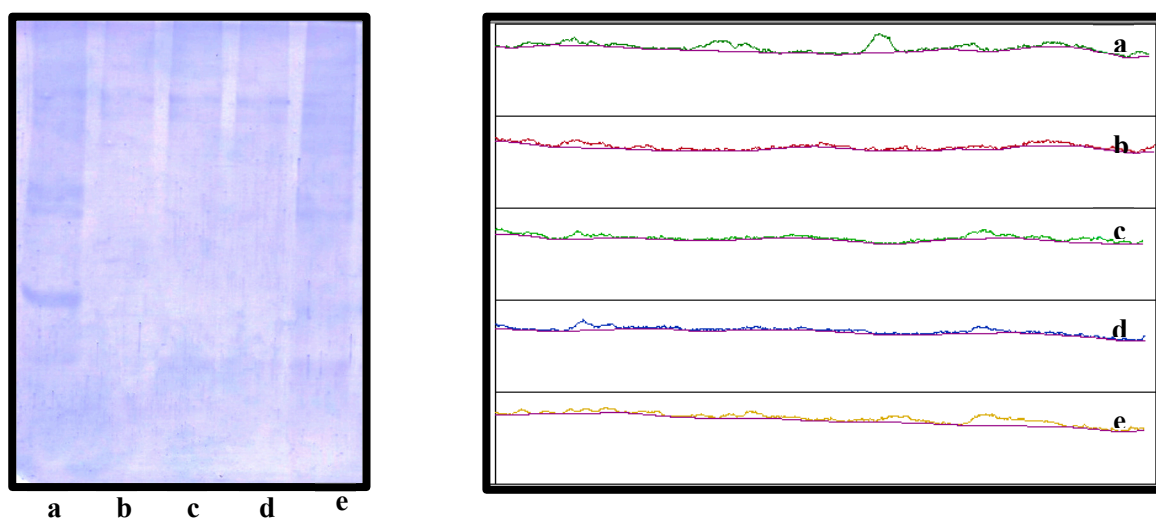

**Figure S9.** SDS-PAGE profile of the crude 'Señorita' banana protein extract at different digestion hours and their corresponding densitometric analysis, wherein: a) undigested crude extract; b) 3-hour crude extract digest; c) 4-hour crude extract digest; d) 12-hour crude extract digest; e) 24-hour crude extract digest.

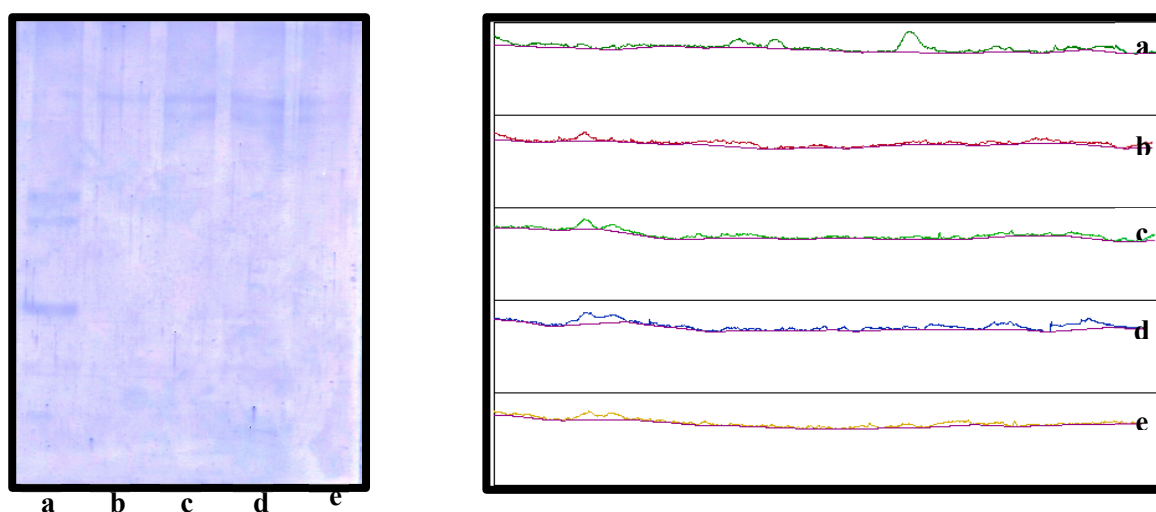

**Figure S10.** SDS-PAGE profile of the partially purified 'Señorita' banana protein extract at different digestion hours and their corresponding densitometric analysis, wherein: a) undigested partially purified extract; b) 3-hour partially purified extract digest; c) 4-hour partially purified extract digest; d) 12-hour partially purified extract digest; e) 24-hour partially purified extract digest.

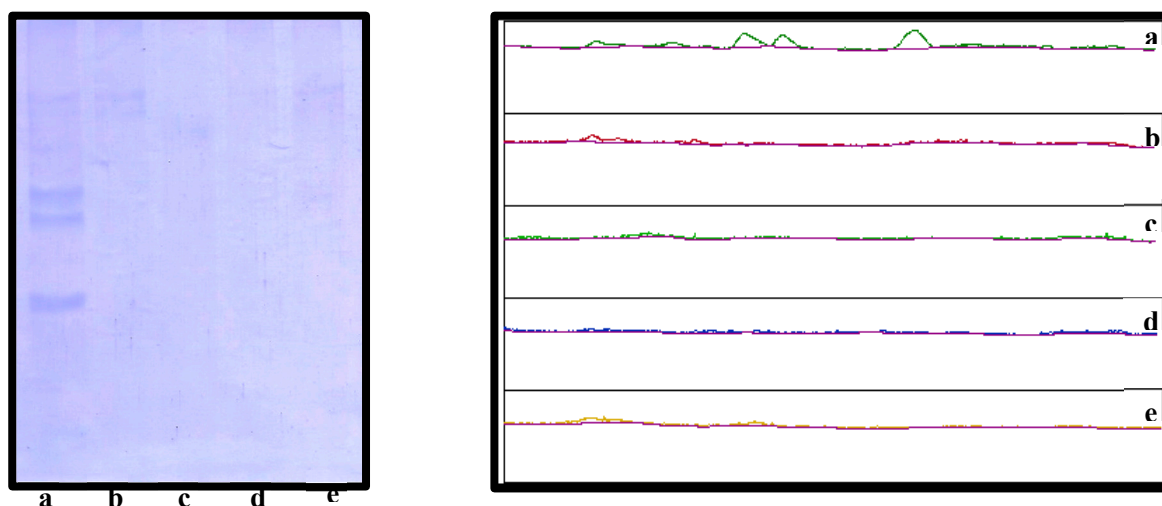

**Figure S11.** SDS-PAGE profile of the purified 'Señorita' banana protein extract at different digestion hours and their corresponding densitometric analysis, wherein: a) undigested purified extract; b) 3-hour purified extract digest; c) 4-hour purified extract digest; d) 12-hour purified extract digest; e) 24-hour purified extract digest.

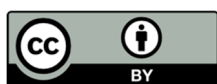

© 2020 by the authors. Submitted for possible open access publication under the terms and conditions of the Creative Commons Attribution (CC BY) license (<http://creativecommons.org/licenses/by/4.0/>).
